# Supplementary material for: Controllable synthesis of NiCo2O4 nanoparticles supported on MnO2 nanowires with excellent oxidase-mimicking performance
Source: Royal Society of Chemistry journal article supplement (doi:10.1039/d4ce00327f), 2024-01-01
Supplement: d4ce00327f1.pdf [file d4ce00327f1.pdf]

## Supplementary Information

### **Controllable synthesis of NiCo<sub>2</sub>O<sub>4</sub> nanoparticles supported on MnO<sub>2</sub> nanowires with excellent oxidase-mimicking performance**

Yu Chen<sup>a‡</sup>, Yanchun Xie<sup>a‡</sup>, Yizhi Gao<sup>a</sup>, Ran Ding<sup>a</sup>, Xingsheng Ding, Suping Han<sup>b\*</sup>, Min Zhang<sup>a\*</sup>

<sup>a</sup>College of Chemistry and Chemical Engineering, Shanghai University of Engineering Science, Shanghai 201620, PR China. E-mail: zhangmin@sues.edu.cn

<sup>b</sup>Department of Pharmacy, Shandong Medical College, No. 5460 Erhuannanlu Road, Jinan 250002, China, supinghan@163.com.

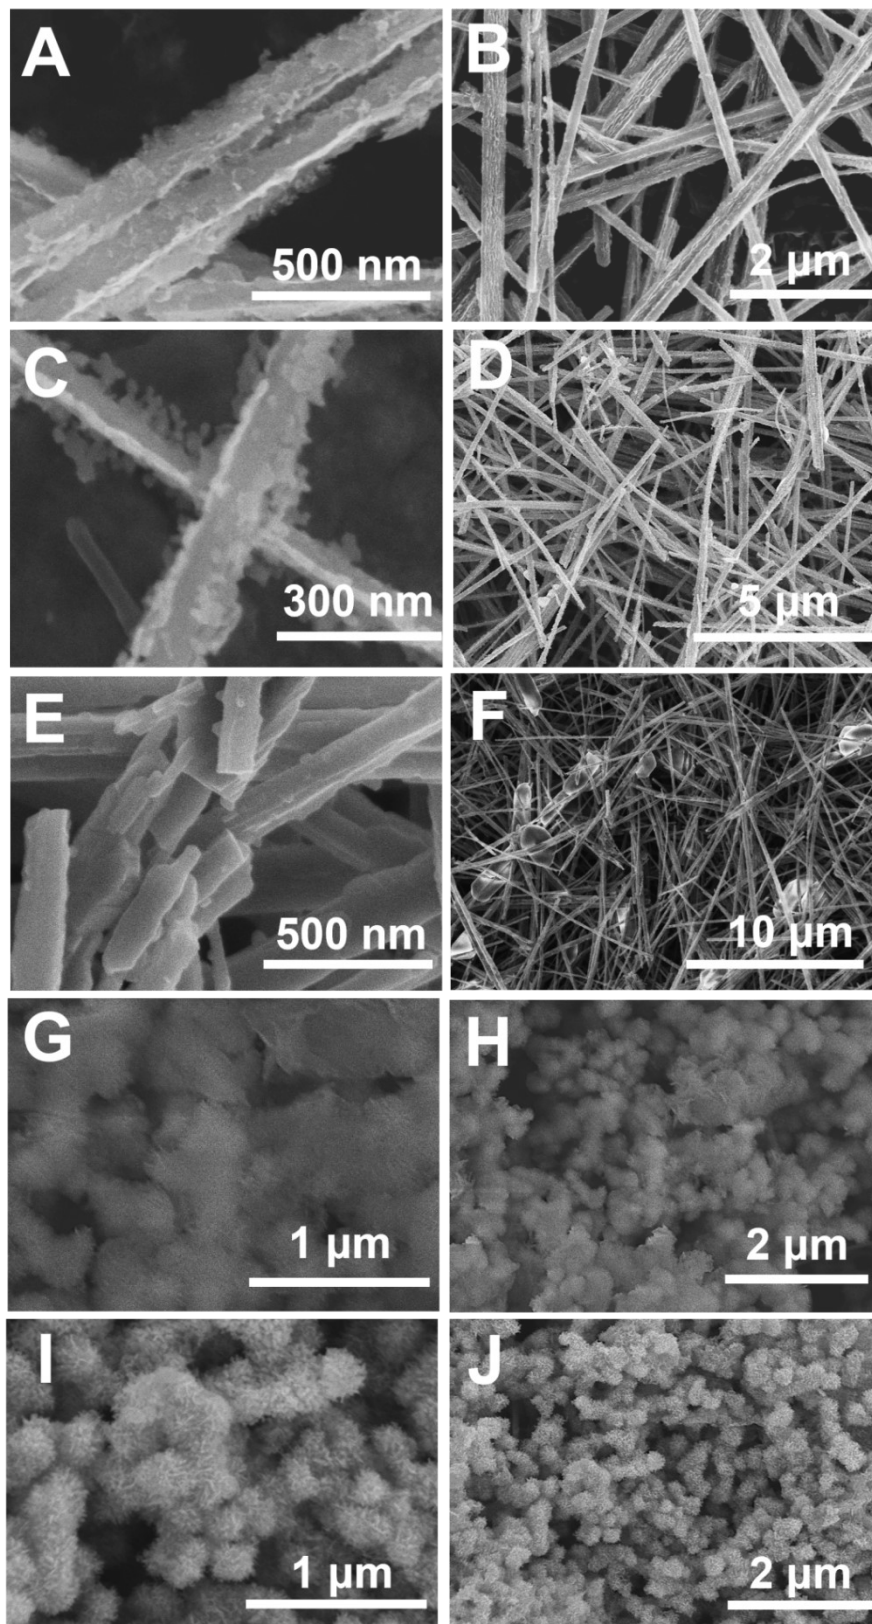

**Figure S1** The SEM images of MnO<sub>2</sub>@NiCo<sub>2</sub>O<sub>4</sub>/300 (A,B), MnO<sub>2</sub>@NiCo<sub>2</sub>O<sub>4</sub>/700 (C,D), MnO<sub>2</sub>@NiCo<sub>2</sub>O<sub>4</sub>/800 (E,F), (Ni-Co)LDH (G,H) and NiCo<sub>2</sub>O<sub>4</sub> (I,J).

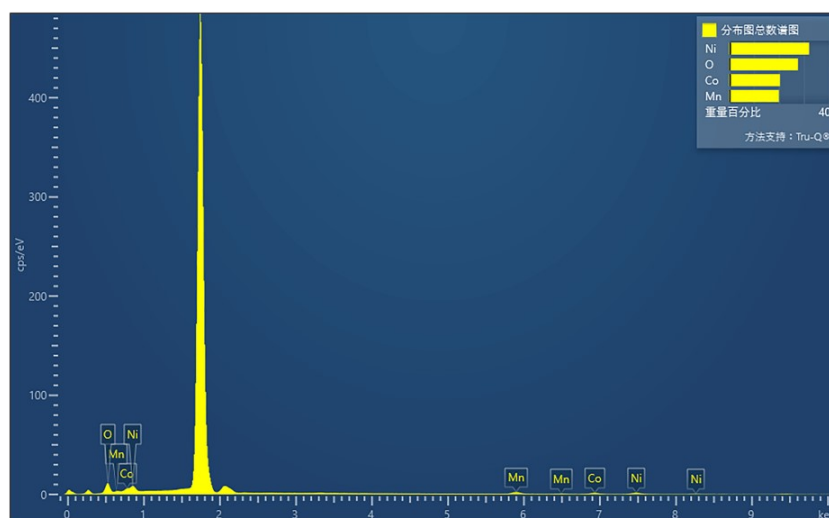

Figure S2 EDX spectrum of  $\text{MnO}_2@/\text{NiCo}_2\text{O}_4/500$ .

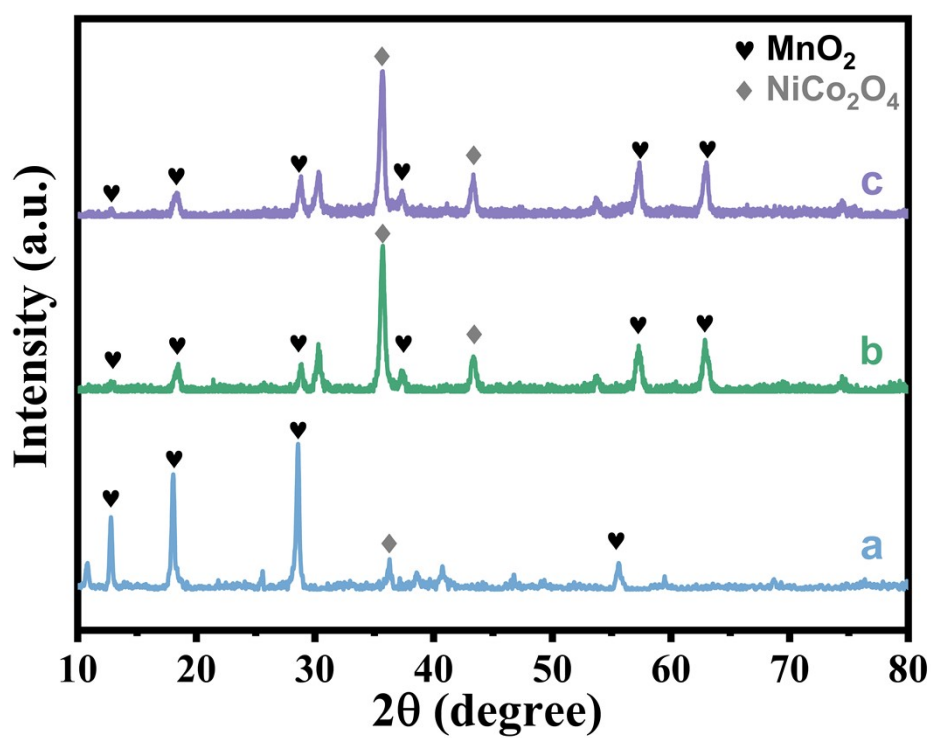

Figure S3 Curve a shows the XRD pattern of  $\text{MnO}_2@/\text{NiCo}_2\text{O}_4/300$ ; Curve b shows the XRD pattern of  $\text{MnO}_2@/\text{NiCo}_2\text{O}_4/700$ ; Curve c shows the XRD pattern of  $\text{MnO}_2@/\text{NiCo}_2\text{O}_4/800$ .

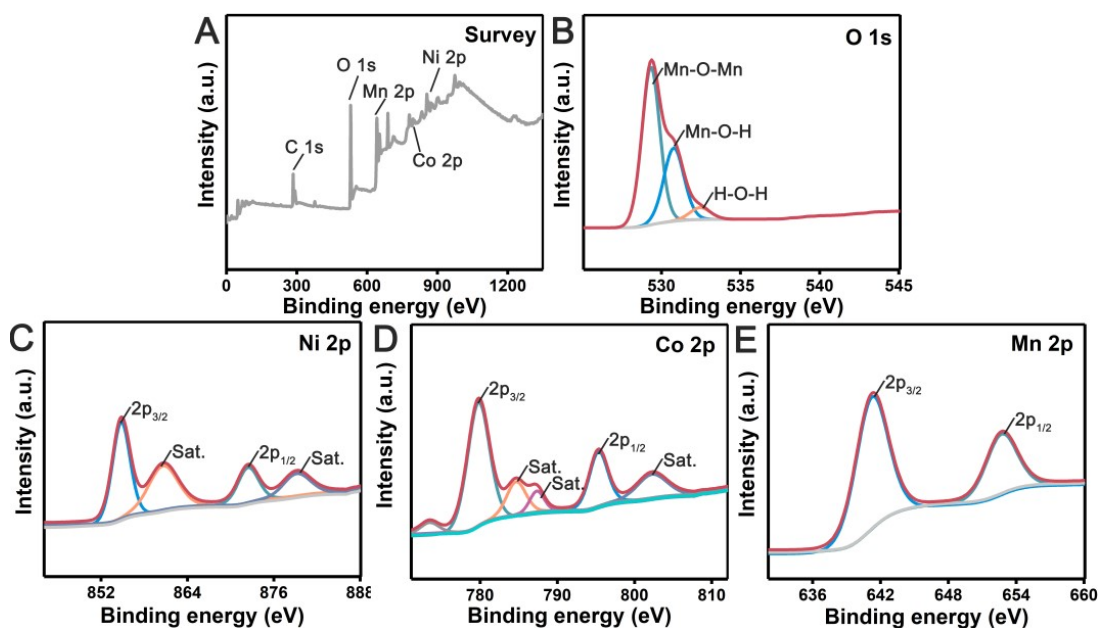

**Figure S4** XPS spectra of  $\text{MnO}_2@ \text{NiCo}_2\text{O}_4$  composites: (A) survey spectra, (B) O 1s, (C) Ni 2p, (D) Co 2p, and (E) Mn 2p.

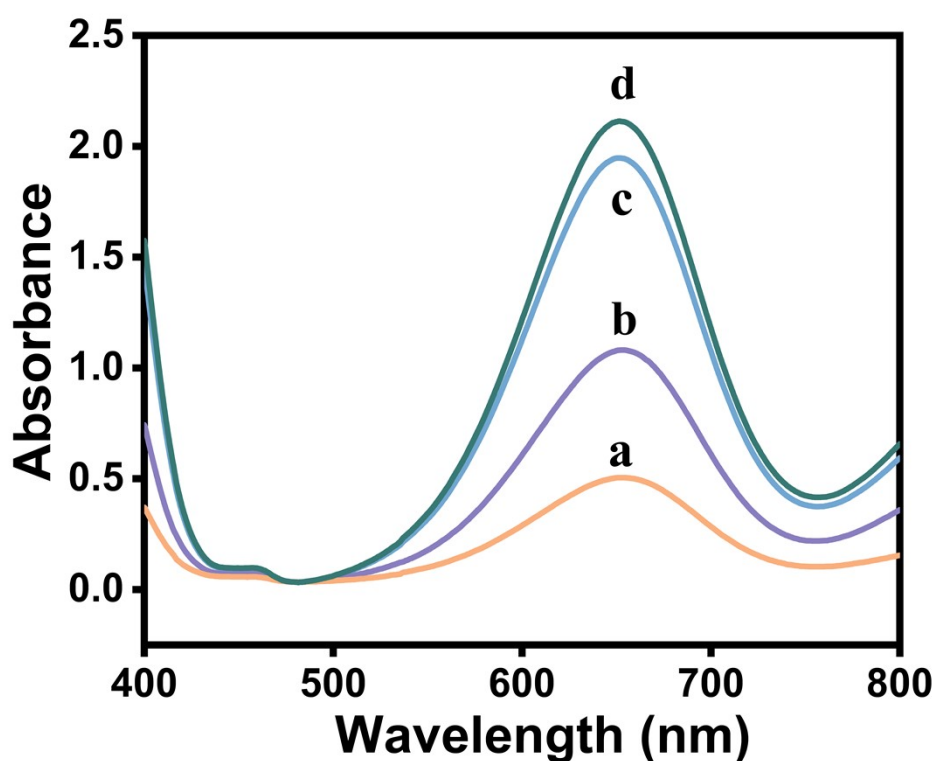

**Figure S5** Curve a shows the UV-vis spectra of 0.4 mg/mL of the  $\text{MnO}_2@ \text{NiCo}_2\text{O}_4/800$ ; Curve b shows the UV-vis spectra of 0.4 mg/mL of the  $\text{MnO}_2@ \text{NiCo}_2\text{O}_4/700$ ; Curve c shows the UV-vis spectra of 0.4 mg/mL of the  $\text{MnO}_2@ \text{NiCo}_2\text{O}_4/300$ ; Curve d shows the UV-vis spectra of 0.4

mg/mL of the  $\text{MnO}_2@\text{NiCo}_2\text{O}_4/500$ . All experiments were performed by adding 380  $\mu\text{L}$  of HAC-NaAc buffer (0.2 mol/L, pH 4.0) and 10  $\mu\text{L}$  of TMB (10 mmol/L) at 25 °C for 3 min.
